# Supplementary material for: Aβ42 Mutants with Different Aggregation Profiles Induce Distinct Pathologies in Drosophila
Source: PLOS journal article supplement (doi:10.1371/journal.pone.0001703), 2008-02-26

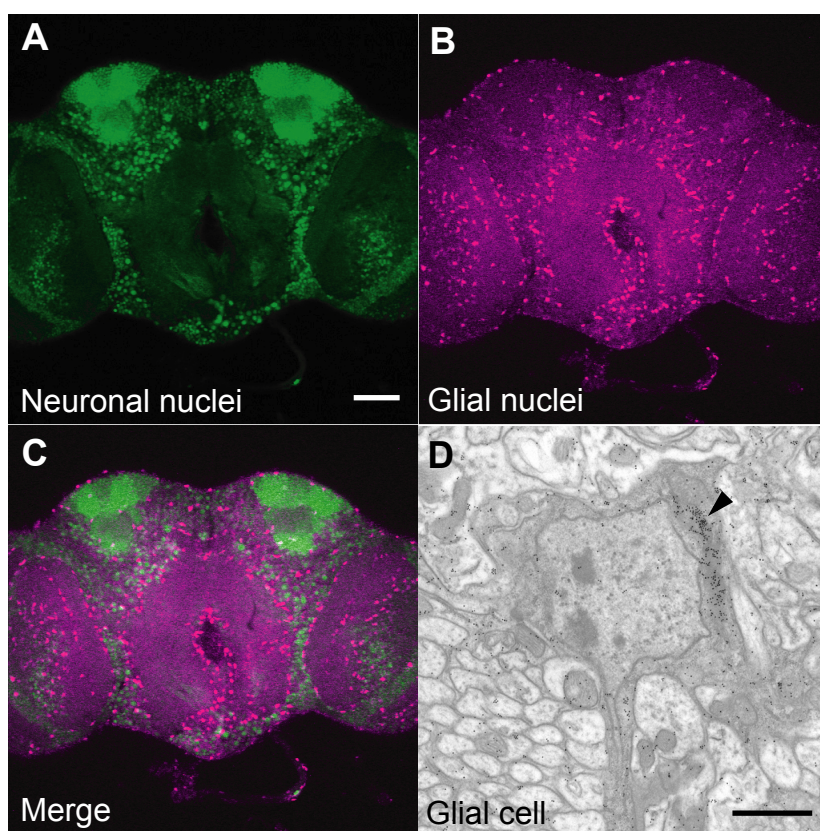

Supplement: S3 (10.1371/journal.pone.0001703.s003) [file journal.pone.0001703.s003]
