# Supplementary material for: Aβ42 Mutants with Different Aggregation Profiles Induce Distinct Pathologies in Drosophila
Source: PLOS journal article supplement (doi:10.1371/journal.pone.0001703), 2008-02-26
Supplement: S9 (10.1371/journal.pone.0001703.s009) [file journal.pone.0001703.s009]

| Transgenic line                    | A $\beta$ expression <sup>1)</sup> | Climbing defects (dae) <sup>2)</sup> | Average lifespan (dae)   |
|------------------------------------|------------------------------------|--------------------------------------|--------------------------|
| A $\beta$ 42 S                     | 1.89 $\pm$ 0.17                    | 25                                   | 35.6 (n=111 flies)       |
| <b>A<math>\beta</math>42 M*</b>    | <b>1.00</b>                        | <b>35</b>                            | <b>46.2 (n=89 flies)</b> |
| A $\beta$ 42 W                     | 0.44 $\pm$ 0.10                    | 40                                   | 53.3 (n=93 flies)        |
| A $\beta$ 42Arc S(M+W)             | 1.68                               | 15 <sup>†</sup>                      | 21.2 (n=116 flies)       |
| <b>A<math>\beta</math>42Arc M*</b> | <b>1.01 <math>\pm</math> 0.06</b>  | <b>25</b>                            | <b>32.9 (n=98 flies)</b> |
| A $\beta$ 42Arc W                  | 0.67 $\pm$ 0.04                    | 35                                   | 44.4 (n=99 flies)        |
| A $\beta$ 42art S                  | 2.40 $\pm$ 0.23                    | 25                                   | 31.4 (n=99 flies)        |
| <b>A<math>\beta</math>42art M*</b> | <b>1.02 <math>\pm</math> 0.05</b>  | <b>45</b>                            | <b>51.4 (n=97 flies)</b> |
| Control                            | -                                  | -                                    | 72.4 (n=95 flies)        |

<sup>1)</sup> Relative levels of A $\beta$  to A $\beta$ 42 M are shown (n=3, average  $\pm$  SD). <sup>2)</sup> Days-after-eclosion (dae) when climbing disability in 80% of the flies occurred except for <sup>†</sup>. <sup>†</sup> Days-after-eclosion (dae) when climbing disability in 70% of the flies occurred.
